1

2

3

Running head: THE IMPACT OF THE NULL RANGE IN DEC

4

5

Title: Non-null Effects of the Null Range in Biogeographic Models: Exploring Parameter

6

Estimation in the DEC Model

7

8

Kathryn A. Massana<sup>1</sup>, Jeremy M. Beaulieu<sup>2</sup>, Nicholas J. Matzke<sup>3</sup> and Brian C. O’Meara<sup>4</sup>

9

10

*<sup>1</sup>Department of Ecology and Evolutionary Biology, University of Tennessee, Knoxville,*

11

*TN, 37996-1610, USA, [kmassana@vols.utk.edu](mailto:kmassana@vols.utk.edu)*

12

*<sup>2</sup>National Institute for Biological and Mathematical Synthesis, University of Tennessee,*

13

*Knoxville, TN 37996, USA, [jbeaulieu@nimbios.org](mailto:jbeaulieu@nimbios.org)*

14

*<sup>3</sup>National Institute for Biological and Mathematical Synthesis, University of Tennessee,*

15

*Knoxville, TN 37996, USA, [matzke@nimbios.org](mailto:matzke@nimbios.org)*

16

*<sup>4</sup>Department of Ecology and Evolutionary Biology, University of Tennessee, Knoxville,*

17

*TN, 37996-1610, USA, [bomeara@utk.edu](mailto:bomeara@utk.edu)*

18

19

20

21

22

23

Email for correspondence: [kmassana@vols.utk.edu](mailto:kmassana@vols.utk.edu)

24 *Abstract.* – Historical biogeography seeks to understand the distribution of biodiversity in  
25 space and time. The dispersal-extinction-cladogenesis (DEC) model, a likelihood-based  
26 model of geographic range evolution, is widely used in assessing the biogeography of  
27 clades. Robust inference of dispersal and local extinction parameters is crucial for  
28 biogeographic inference, and yet a major caveat to its use is that the DEC model severely  
29 underestimates local extinction. We suggest that this is mainly due to the way in which  
30 the model is constructed to allow observed species to transition into being present in no  
31 areas (i.e., null range). By prohibiting transitions into the null range in the transition rate  
32 matrix, we were able to better infer local extinction and support this with simulations.  
33 This modified model, DEC\*, has higher model fit and model adequacy than DEC,  
34 suggesting this modification should be considered for DEC and other models of  
35 geographic range evolution.

36

37 **Keywords:** Lagrange, historical biogeography, local extinction, DEC, geographic range  
38 evolution, BioGeoBEARS

39

40

41

42

43

44

45

46

47

## INTRODUCTION

48

49

50

51

52

53

54

Historical biogeography has developed from simply observing the general patterns of species, to incorporating events that explain biogeographic processes (such as vicariance and dispersal), to developing explicit probabilistic approaches. With the advent of parametric methods based on maximum likelihood and Bayesian frameworks, researchers have been able to incorporate important information, such as branch lengths and fossils (e.g., allowing for better tree dating estimates) (Smith and Donoghue 2010; Wood et al. 2012; Beaulieu et al. 2013a; Pyron 2014).

55

56

57

58

59

60

61

62

63

64

65

66

A popular method (cited 499 times since its publication) to assess the historical biogeography of taxa is the dispersal-extinction-cladogenesis (DEC) model (Ree and Smith 2008), which estimates geographic range evolution for anagenetic (i.e., along branches) and cladogenetic (i.e., at nodes) change on a phylogeny. In the case of anagenetic change, range expansion and range contraction [modeled as parameters by way of the rate of dispersal from area  $i$  to area  $j$  ( $D_{ij}$ ) and local extinction in area  $i$  ( $E_i$ )] are modeled as stochastic processes along branches. Published analyses with DEC assume the simplest model involving only a single dispersal rate and a single local extinction event, although it is possible to have more complex models (i.e., allowing different dispersal rates among each area pair by having  $n^2-n$  free parameters for the dispersal rates, and  $n$  free parameters for local extinction). A rate matrix can be assembled for a given number of geographic ranges and rate parameters (Fig. 1).

67

68

69

Ree and Smith (2008) carried out simulations to test the accuracy of the DEC model on parameter estimation. They found that although the model worked reasonably well, dispersal was underestimated and local extinction was severely underestimated,

70 often estimated as being effectively zero. Note that while there has been a robust  
71 discussion of whether extinction rates can be estimated on molecular phylogenies (Nee et  
72 al. 1994; Rabosky 2010; Beaulieu and O'Meara 2015), the extinction rate in that case  
73 relates to speciation and extinction of entire species and its signal on a phylogeny's  
74 topology and branch lengths. The extinction rate relevant for our purposes is the rate of  
75 having a population no longer occurring in a particular area, using a fixed tree. In terms  
76 of its role in a model, it is more like the rate of reduction in a meristic character than a  
77 rate at which a species goes extinct, even though biologically it appears more similar to  
78 the latter. Thus, its difficulty in being estimated is surprising.

79 One feature of the DEC model that has received little comment is that it includes  
80 a null range (a geographic range of 0 areas) in the anagenesis transition matrix (Fig. 1). In  
81 one sense, inclusion of the null range is a natural modeling decision, since the assumption  
82 that local extirpation is a process directly implies that the same process can reduce a  
83 single area geographic range to a range of size 0. However, the inclusion of a null range  
84 in the state space has some peculiar properties. For instance, no sampled species will ever  
85 occupy the null range state; even extinct species, if included in an analysis, are included  
86 because they occurred in some area. We suspect that the only way to fit any data pattern  
87 that does not observe null ranges is by driving down the rate of range contraction to the  
88 point where the probability of such an event is effectively zero. Unfortunately, given that  
89 all transitions to other extinction scenarios are linked through a global extinction  
90 parameter it seems unavoidable that when null ranges are allowed in the model extinction  
91 would generally be underestimated.

92           Of course, in some ways, the extinction rate is a nuisance parameter – that is, the  
93 hundreds of studies using the DEC model primarily focus on ancestral state estimates  
94 rather than on rates. However, given that this rate represents one of the two free  
95 parameters that are then used for inferring ancestral states on the tree, we expect that  
96 biased extinction estimates may result in errors in the ancestral state estimation. In other  
97 words, given low extinction rate estimates, areas can only be lost at speciation events, so  
98 we predict a greater number of areas as we move rootward on the tree and few area losses  
99 along longer branches. This study attempts to modify the DEC model to improve  
100 estimation of extinction rate and then tests using simulated and empirical data to see if  
101 this results in a better model overall.

102

103

## METHODS

104

105

106

107

108

109

110

111

112

113

114

We modified the DEC model (which we refer to DEC\* hereafter) to omit transitions into the null state in the anagenesis transition rate matrix between ancestor and descendent pairs (Fig. 1). It has the same number of parameters as DEC (dispersal and local extinction,  $d$  and  $e$  respectively), with the only change being fixing the transition rate to 0 for transitions from ranges of size 1 to the null range. DEC\* is distinct from the three-parameter DEC+J model which allows for founder-event speciation associated with lineage-splitting with the addition of the free  $j$  parameter (Matzke 2014b). DEC+J retains the DEC assumption that a null geographic range is a valid state. To implement the DEC\* model, we modified the original lagrange DEC C++ code (<https://github.com/rhr/lagrange-cpp>) to omit the transition into the null range in the anagenesis transition rate matrix. The DEC\* model is implemented as a modification to

115 the DEC C++ version, and is also allowed in the BioGeoBEARS R package (Matzke  
116 2013) by changing the *include\_null\_range* setting from TRUE to FALSE in the  
117 BioGeoBEARS model setup.

118 We implemented our own DEC simulator in R that follows the procedures  
119 described by Ree and Smith (2008). The simulator produces birth-death phylogenetic  
120 trees with concurrent range evolution, combining the DEC model and stochastic  
121 cladogenesis. The simulator also does the same for the DEC\* model. Trees were  
122 produced with the same known dispersal and local extinction parameter, constrained to  
123 vary between 0.01 and 0.2, while speciation was constrained to be 0.4 events per million  
124 years. Geography consisted of three possible hard-coded geographic areas, meaning that  
125 there were 8 possible geographic ranges in the state space of the DEC simulation (A, B,  
126 C, AB, AC, BC, ABC, and null), and 7 possible ranges in the DEC\* simulation (as the  
127 null range state is excluded). At cladogenesis, when the lineage had a widespread range,  
128 equal probabilities were assigned to each allowed range-inheritance scenario (vicariance  
129 or subset sympatry). For both DEC and DEC\*, we performed 2,000 simulation-inference  
130 runs and compared dispersal and local extinction parameter estimates as well as the  
131 number of correctly inferred number of areas at internal nodes for all simulations. The  
132 simulations began by assigning the root node a range of a random single geographic area.  
133 The phylogeny was allowed to grow according to the DEC or the DEC\* model until it  
134 reached 100 taxa (extant plus extinct). To match empirical datasets, the simulated  
135 phylogenies were pruned of branches that went extinct.

136 Our main objective was to understand DEC\* versus DEC analyses on empirical  
137 datasets. Therefore, we searched the literature for published studies that used the DEC

138 model. Then we compiled the phylogenies and geography presence/absence data  
139 available, which resulted in 15 empirical datasets. Most of these datasets were used in  
140 Matzke (2014b), and followed any modifications made therein (Kambysellis et al. 1995;  
141 Baldwin and Sanderson 1998; Hormiga et al. 2003; Jordan et al. 2003; Clark et al. 2008;  
142 Dunbar-Co 2008; Ree and Smith 2008; Benavides et al. 2009; Clark et al. 2009; Gillespie  
143 and Baldwin 2010; Smith and Donoghue 2010; Lerner et al. 2011; Nicholson et al. 2012;  
144 Bennett et al. 2013; Lapoint et al. 2013; Matzke 2014a). However, we also assessed the  
145 caecilian and salamander datasets from a recent published study using DEC+J (Pyron  
146 2014), and a palpimanoid spider dataset (Wood et al. 2012). We performed unconstrained  
147 analyses with C++ DEC and DEC\* on each dataset. We compared analyses between  
148 DEC, DEC\*, and DEC+J for all 15 datasets. If the values were not available, we used the  
149 package BioGeoBEARS (Matzke 2013) to run all DEC+J analyses. We also assessed  
150 model adequacy for each dataset by comparing the number of areas estimated per node  
151 between DEC and DEC\* to the observed modern geographic range sizes.

152

153

## RESULTS

154

### *Simulations*

155

156

157

158

159

160

Figure 2 shows the observed parameter estimates of local extinction and dispersal for DEC and DEC\* compared to the true estimates under a DEC simulation. Overall, the point estimate for local extinction was closer to the true value under DEC\* than with DEC (Fig. 2), although with higher variance. With simulations under the DEC model we found that the median for local extinction under a DEC\* inference ( $e=0.0957$ ) was closer to the true local extinction median estimate ( $e=0.0989$ ), while the median for local

161 extinction under DEC inference was close to zero ( $e=1.287e-06$ ). Similarly, with  
162 simulations under the DEC\* model we found that the median local extinction estimated  
163 under DEC\* inference ( $e=0.1028$ ) is almost identical to the true local extinction  
164 parameter ( $e=0.1030$ ), whereas, again, local extinction is grossly underestimated under  
165 the DEC inference ( $e=1.200e-6$ ).

166 Median estimates of dispersal under DEC simulations were closer to the median  
167 of the true dispersal parameter ( $d=0.0989$ ) under DEC\* than under DEC inference  
168 ( $d=0.0766$ ) (Fig. 2). When simulating under DEC\* (Supplemental Fig. 1), the median  
169 dispersal under DEC\* inference ( $d=0.1053$ ) was again closer to the median dispersal rate  
170 used in the simulation ( $d=0.1030$ ) than dispersal inferred under DEC ( $d=0.0789$ ).

171 We calculated the root mean square error (RMSE) of the estimated parameter  
172 values for DEC and DEC\*. The root mean square error gives the standard deviation  
173 associated with the differences between the true parameter and the inferred parameter  
174 estimates, and here a smaller value indicates less error in the parameter inference. Results  
175 indicated that on the logarithmic scale the error for  $e$  was far better for DEC\* than DEC  
176 and nearly the same for  $d$  (RMSE of  $e$  was 10.9120 for DEC and 3.8363 for DEC\*;  
177 RMSE of  $d$  was 0.3784 for DEC and 0.3886 for DEC\*). However, on a linear scale, error  
178 is far better for both parameters for DEC than DEC\*, due to some tremendously high  
179 values of  $e$ . (RMSE of  $e$  was 0.1135 for DEC and 2.2345 for DEC\*; RMSE of  $d$  was  
180 0.0363 for DEC and 0.7816 for DEC\*).

181 Finally, we assessed the accuracy of DEC against DEC\* in estimating the  
182 geographic area range at the root. Under DEC simulation, the root state was correctly  
183 estimated 49.05% of the time, whereas under DEC\*, 58.30% of root states were



184 accurately estimated.

185

### 186 *Empirical Datasets*

187 In comparisons of DEC and DEC\* on empirical datasets, likelihood was always  
188 better under DEC\*. Thus, AIC always selected DEC\* as the better model over DEC (as  
189 the two models have the same number of parameters). In 10 out of 15 empirical datasets,  
190 AIC selected DEC\* over DEC+J (Supplementary Table 1). DEC+J has an extra  
191 parameter relative to DEC\*, so if likelihoods were equal between DEC+J and DEC\*,  
192 DEC\* would be preferred by AIC. However, in all but one of the cases where AIC  
193 preferred DEC\* over DEC+J, the likelihood was itself better with DEC\* (which is  
194 possible, as the two models are not nested). The exception was *Psychotria*, where AIC  
195 gives DEC\* 50.2% of the model weight despite slightly higher likelihood for DEC+J  
196 (model weight 20.4%).

197 Unlike the simulated data, for over half the empirical datasets the extinction rate  
198 inferred by DEC was substantially higher than zero, ranging from 16% to 546% of the  
199 estimated value of the dispersal rate. For DEC\*, the extinction rates were even higher  
200 relative to dispersal: only for one empirical dataset was the extinction rate  
201 indistinguishable from zero, for the rest the extinction rate was between 3.2 and 1389-  
202 fold higher than dispersal rate (median 104-fold higher). In some cases, the estimated  
203 extinction rate was at the maximum allowed by the program; modifying it to increase the  
204 bound by tenfold improved the likelihood by a median of 0.061 log likelihood units and  
205 increased the extinction estimate up to the new maximum in most cases. The small  
206 magnitude of improvement, with the large magnitude of change in the estimate, suggests

207 that the likelihood surface is very flat but that the unconstrained maximum likelihood  
208 estimate would be even higher. More simply put, for these datasets, the best estimate of  
209 extinction is extremely high, which would mean that after a species expands its range it  
210 nearly instantly contracts it (into either the new region or back to the old region). In only  
211 three of nine of these datasets was DEC+J chosen over DEC\*, despite the apparent  
212 evidence for a jump-like dispersal model.

213

#### 214 *Model Adequacy*

215 In addition to model choice, a key question to examine with new models is model  
216 adequacy: how well does the model fit overall? Even the best-fitting model may not do a  
217 good job predicting the data, which would point to the need for new models to better  
218 match reality. This has been increasingly emphasized in phylogenetics (Goldman 1993;  
219 Bollback 2002; O'Meara 2012; Beaulieu et al. 2013b; Pennell et al. 2015). To see if the  
220 DEC\* model adequately describes the data, we counted the number of occupied areas  
221 estimated for each node and compared this between DEC and DEC\* for each empirical  
222 dataset. We work under the assumption that the present should look like the past: a clade  
223 of island endemics is more likely to have been island endemics for much of their history,  
224 rather than being composed of very widespread species that only at the present suddenly  
225 became endemic to single islands. Of course, there are processes that could make the  
226 present not resemble the past (i.e., a sudden change in climate causing suitable habitat to  
227 be divided into isolated patches), but this assumption should hold in most groups. For all  
228 but two empirical datasets, the DEC\* model was the more adequate model, with  
229 estimated range sizes at ancestral nodes more closely matching the estimated the mean

230 range sizes observed at the tips of the phylogeny (Fig. 3). Inference under DEC usually  
231 yields ancestral distributions that are very widespread, which is not the case under DEC\*  
232 (Fig. 3 and Fig. 4).

233

## 234 DISCUSSION

235 Given the results, we argue that DEC\* should be considered for use in  
236 biogeographic models. Testing models should be an intrinsic part of the research process,  
237 so most users should try DEC, DEC\*, DEC+J, and future models, but if one were limited  
238 to just one model, in most cases DEC\* would be preferred, based on the empirical results  
239 presented here. DEC\* does a more adequate job at estimating ancestral ranges than does  
240 the canonical DEC model. However, while the median extinction and dispersal  
241 parameters were better estimated under DEC\* than with DEC, the RMSE of the estimates  
242 on a linear scale was better under DEC, and DEC\* often returns very high estimates for  
243 extinction rate. For estimating ancestral areas, DEC\* is probably the better model, but we  
244 urge extreme caution when treating its rate parameters as parameters of interest rather  
245 than nuisance parameters. Of course, ancestral states are known to be difficult to estimate  
246 well (Cunningham 1999; Oakley and Cunningham 2000), so biologists should expect a  
247 great deal of uncertainty with estimates. We also note that the estimates of uncertainty in  
248 this model are always underestimates, due to other uncertainty (topology, branch lengths,  
249 states) that is typically not accounted for.

250 Another caveat to the use of DEC\* is its treatment of the phylogeny: it assumes  
251 range evolves on a tree but that biogeography does not directly influence speciation or  
252 extinction. Speciation often seems influenced by geographic context (Mayr 1963), such

253 as through the divergence of two isolated populations. While DEC, DEC\*, and DEC+J  
254 allow subdivision of ranges at speciation events, these models do not, for example, fit a  
255 higher speciation rate to species with larger ranges. There are models that jointly fit the  
256 diversification process and process of biogeographic evolution, such as GeoSSE  
257 (Goldberg et al. 2011) and ClaSSE (Goldberg and Igić 2012). However, even though  
258 these models are more realistic, they can require rather large data sets (Davis et al. 2013)  
259 and are feasible only for very few areas. The empirical datasets used in biogeographic  
260 models are typically small in comparison; the ones used in this study had an average of  
261 75 taxa and 5.53 areas from all datasets, and a range of 4 to 10 areas and 9 to 469 taxa.  
262 Recent work (Matzke 2014b) showed that DEC vs. DEC+J model choice appears robust  
263 to some commonly-postulated SSE processes (speciation and extinction depending on  
264 range size), and that ancestral range estimation is reasonably accurate if model choice is  
265 performed and if the dispersal rate is low, suggesting that for datasets that limit the power  
266 of SSE models, the DEC\* model can still be used, with caution.

267         It is important to emphasize that the DEC\* model is still relatively simple.  
268 Though some complexity can be incorporated with different dispersal rates between areas  
269 or at different time points, all species are treated as having the same rates of dispersal and  
270 extinction at a given time. We know, however, that species in a clade may vary in traits  
271 affecting successful dispersal (ability to inbreed, resting stages, wind versus animal  
272 dispersal, tolerance of saltwater, and so forth) or extinction (body size, trophic level,  
273 thermal tolerance, and so forth) and this variation is not yet incorporated in any of these  
274 models. There are additional sources of heterogeneity that also may result in misleading  
275 results if not incorporated.

276           The very high extinction estimates by DEC\*, especially in empirical datasets, was  
277 unexpected. One partial explanation may come from the empirical distribution of range  
278 sizes in the empirical studies presented here, where the vast majority of species were  
279 found in just one area. Under DEC\* (or DEC) the only way for a species to change its  
280 area is through expansion to a new area (i.e., dispersal), followed by other events. Given  
281 that all the studies have species in different areas (there is little point to inferring  
282 biogeographic history for a clade that only ever occupies one area), there must be a  
283 nonzero dispersal rate. Lineages can reduce range size in two ways: at cladogenesis, or  
284 through range contraction along branches. However, when  $e$  is high with respect to  $d$  and  
285 the speciation rate, lineages will spend almost no time in widespread ranges. Therefore,  
286 widespread ranges are essentially never available at cladogenesis, and all speciation will  
287 be sympatric. Moreover, on terminal branches, which represent over half the branches on  
288 the tree, any necessary dispersals cannot be “undone” by contraction at cladogenesis, and  
289 so the only way to have some dispersals along terminal branches, but have observed  
290 species in just one area each, is to have a substantial extinction rate. DEC\* with high  $e$  is  
291 a model with all range-change effectively occurring in anagenetic “jumps” along the  
292 branches: any expansion is followed almost immediately by a contraction. The fact that  
293 DEC\* often outperforms DEC+J probably indicates that in these cases, the probability of  
294 sister taxa living in different areas correlates better with the branch length between the  
295 taxa than with the number of speciation events recorded in the observed tree. We expect a  
296 DEC\*+J model may incorporate the best of both of these models, and that adding “\*” to  
297 other models may also be beneficial.



321 U.S. Department of Homeland Security, and the U.S. Department of Agriculture through  
322 NSF Award #EF-0832858, with additional support from The University of Tennessee,  
323 Knoxville.

324

325

#### REFERENCES

- 326 Baldwin, B. G. and M. J. Sanderson. 1998. Age and rate of diversification of the  
327 Hawaiian silversword alliance (Compositae). *Proceedings of the National*  
328 *Academy of Sciences* 95:9402-9406.
- 329 Beaulieu, J., D. Tank, and M. Donoghue. 2013a. A Southern Hemisphere origin for  
330 campanulid angiosperms, with traces of the break-up of Gondwana. *BMC*  
331 *Evolutionary Biology* 13:80.
- 332 Beaulieu, J. M. and B. C. O'Meara. 2015. Extinction can be estimated from moderately  
333 sized molecular phylogenies. *Evolution* 69:1036-1043.
- 334 Beaulieu, J. M., B. C. O'Meara, and M. J. Donoghue. 2013b. Identifying hidden rate  
335 changes in the evolution of a binary morphological character: the evolution of  
336 plant habit in campanulid angiosperms. *Systematic biology*.
- 337 Benavides, E., R. Baum, H. M. Snell, H. L. Snell, and J. W. Sites, Jr. 2009. Island  
338 biogeography of Galapagos lava lizards (Tropiduridae: Microlophus): species  
339 diversity and colonization of the archipelago. *Evolution* 63:1606-1626.
- 340 Bennett, G. M., P. M. O'Grady, and K. Triantis. 2013. Historical biogeography and  
341 ecological opportunity in the adaptive radiation of native Hawaiian leafhoppers  
342 (Cicadellidae:Nesophrosyne). *Journal of Biogeography* 40:1512-1523.

- 343 Bollback, J. P. 2002. Bayesian model adequacy and choice in phylogenetics. *Molecular*  
344 *Biology and Evolution* 19:1171-1180.
- 345 Clark, J. R., R. H. Ree, M. E. Alfaro, M. G. King, W. L. Wagner, and E. H. Roalson.  
346 2008. A Comparative Study in Ancestral Range Reconstruction Methods:  
347 Retracing the Uncertain Histories of Insular Lineages. *Systematic Biology*  
348 57:693-707.
- 349 Clark, J. R., W. L. Wagner, and E. H. Roalson. 2009. Patterns of diversification and  
350 ancestral range reconstruction in the southeast Asian–Pacific angiosperm lineage  
351 *Cyrtandra* (Gesneriaceae). *Molecular Phylogenetics and Evolution* 53:982-994.
- 352 Cunningham, C. W. 1999. Some Limitations of Ancestral Character-State Reconstruction  
353 When Testing Evolutionary Hypotheses. *Systematic Biology* 48:665-674.
- 354 Davis, M. P., P. E. Midford, and W. Maddison. 2013. Exploring power and parameter  
355 estimation of the BiSSE method for analyzing species diversification. *Bmc*  
356 *Evolutionary Biology* 13.
- 357 Dunbar-Co, S. 2008. Island evolution: phylogeny, adaptive radiation, and biogeography  
358 of *Plantago* (Plantaginaceae) in the Hawaiian Islands.
- 359 Gillespie, R. G. and B. G. Baldwin. 2010. Island biogeography of remote archipelagoes.  
360 The theory of island biogeography revisited:358-387.
- 361 Goldberg, E. E. and B. Igić. 2012. Tempo and Mode in Plant Breeding System Evolution.  
362 *Evolution* 66:3701-3709.
- 363 Goldman, N. 1993. Simple diagnostic statistical tests of models for DNA substitution.  
364 *Journal of molecular evolution* 37:650-661.



- 365 Hormiga, G., M. Arnedo, and R. G. Gillespie. 2003. Speciation on a Conveyor Belt:  
366 Sequential Colonization of the Hawaiian Islands by Orsonwelles Spiders  
367 (Araneae, Linyphiidae). *Systematic Biology* 52:70-88.
- 368 Jordan, S., C. Simon, and D. Polhemus. 2003. Molecular Systematics and Adaptive  
369 Radiation of Hawaii's Endemic Damselfly Genus *Megalagrion* (Odonata:  
370 *Coenagrionidae*). *Systematic Biology* 52:89-109.
- 371 Kambysellis, M. P., K.-F. Ho, E. M. Craddock, F. Piano, M. Parisi, and J. Cohen. 1995.  
372 Pattern of ecological shifts in the diversification of Hawaiian *Drosophila* inferred  
373 from a molecular phylogeny. *Current Biology* 5:1129-1139.
- 374 Lapoint, R. T., P. M. O'Grady, and N. K. Whiteman. 2013. Diversification and dispersal  
375 of the Hawaiian *Drosophilidae*: the evolution of *Scaptomyza*. *Mol Phylogenet*  
376 *Evol* 69:95-108.
- 377 Lerner, H. R., M. Meyer, H. F. James, M. Hofreiter, and R. C. Fleischer. 2011.  
378 Multilocus resolution of phylogeny and timescale in the extant adaptive radiation  
379 of Hawaiian honeycreepers. *Current biology : CB* 21:1838-1844.
- 380 Matzke, N. J. 2013. *BioGeoBEARS: BioGeography with Bayesian (and Likelihood)*  
381 *Evolutionary Analysis in R Scripts*. University of California, Berkeley, Berkeley,  
382 CA.
- 383 Matzke, N. J. 2014a. Data from: Model selection in historical biogeography reveals that  
384 founder-event speciation is a crucial process in island clades. *Dryad Data*  
385 *Repository*.
- 386 Matzke, N. J. 2014b. Model Selection in Historical Biogeography Reveals that Founder-  
387 event Speciation is a Crucial Process in Island Clades. *Systematic Biology*.

- 388 Mayr, E. 1963. Animal species and evolution. *Animal species and their evolution*.
- 389 Nee, S., E. C. Holmes, R. M. May, and P. H. Harvey. 1994. Extinction Rates Can Be  
390 Estimated from Molecular Phylogenies. *Philosophical Transactions of the Royal  
391 Society of London Series B-Biological Sciences* 344:77-82.
- 392 Nicholson, K. E., B. I. Crother, C. Guyer, and J. M. Savage. 2012. It is time for a new  
393 classification of anoles (Squamata: Dactyloidae). *Zootaxa* 3477:1-108.
- 394 O'Meara, B. C. 2012. Evolutionary Inferences from Phylogenies: A Review of Methods.  
395 Pp. 267-285. *Annual Review of Ecology, Evolution, and Systematics*, Vol 43.
- 396 Oakley, T. H. and C. W. Cunningham. 2000. Independent contrasts succeed where  
397 ancestor reconstruction fails in a known bacteriophage phylogeny. *Evolution*  
398 54:397-405.
- 399 Pennell, M. W., R. G. FitzJohn, W. K. Cornwell, and L. J. Harmon. 2015. Model  
400 Adequacy and the Macroevolution of Angiosperm Functional Traits. *The  
401 American Naturalist* 186:E33-E50.
- 402 Pyron, R. A. 2014. Biogeographic Analysis Reveals Ancient Continental Vicariance and  
403 Recent Oceanic Dispersal in Amphibians. *Systematic Biology* 63:779-797.
- 404 Rabosky, D. L. 2010. Extinction Rates Should Not Be Estimated from Molecular  
405 Phylogenies. *Evolution* 64:1816-1824.
- 406 Ree, R. H. and S. A. Smith. 2008. Maximum likelihood inference of geographic range  
407 evolution by dispersal, local extinction, and cladogenesis. *Systematic Biology*  
408 57:4-14.

409 Smith, S. A. and M. J. Donoghue. 2010. Combining historical biogeography with niche  
410 modeling in the Caprifolium clade of Lonicera (Caprifoliaceae, Dipsacales).  
411 Systematic Biology 59:322-341.

412 Wood, H. M., N. J. Matzke, R. G. Gillespie, and C. E. Griswold. 2012. Treating fossils as  
413 terminal taxa in divergence time estimation reveals ancient vicariance patterns in  
414 the palpimanoid spiders. Systematic Biology 62:264-284.

415

416

417

418

419

420

421

422

423

424

425

426

427

428

429

430

431

432 FIGURE LEGENDS

433

434 Figure 1. Diagram showing (a) the allowed cladogenetic events for DEC and DEC\*, (b)  
435 the anagenesis transition rate matrix for DEC, and (c) the DEC\* anagenesis transition rate  
436 matrix, assuming three geographic states (A, B, C). At a cladogenetic event, if a species  
437 is in one area, the descendant species inherits that area. If the species is in multiple areas,  
438 one species inherits one area, while the other species inherits all areas (peripatric  
439 speciation; within area widespread) or it is allowed to inherit all areas but the area  
440 occupied by the first species (vicariant allopatric speciation; between area widespread).  
441 Note that extinction is not allowed in DEC\* from one state to zero states. D = dispersal, E  
442 = local extinction.

443

444 Figure 2. Plots showing parameter inference under the 2,000 DEC simulations. DEC  
445 inference of dispersal (A) was not as effective as dispersal inferred under DEC\* (B).  
446 Local extinction under DEC inference (C) was highly underestimated. Local extinction  
447 under DEC\* (D) was better estimated in comparison to DEC inference, although with  
448 more variance. Purple lines represent 95% confidence intervals; blue line shows the  
449 median; orange line shows the 1:1 line.

450

451 Figure 3. Model adequacy plots based on the number of areas occupied at nodes for the  
452 empirical datasets of the Galapagan *Microlophus* (A), Hawaiian *Plantago* (B), Pacific  
453 *Cyrtandra* (C) reconstructed with DEC or DEC\* versus the tips which represent the  
454 current number of areas for each group. In each empirical case (A, B, C), DEC\* was able

455 to ancestrally infer the same number of areas as the tips in the current range. DEC  
456 inferred ranges that were more widespread. The last plot depicts the mean number of  
457 current areas at tips versus the mean number of areas estimated at nodes through DEC or  
458 DEC\* for each group (D). In each case except for two, DEC\* was able to estimated the  
459 ancestors to occupy the same number of areas as the tips.

460

461 Figure 4. Most probable number of biogeographic areas estimated in the *Plantago* clade  
462 under the DEC (A) versus the DEC\* model (B). The number of areas at tips is also  
463 shown. The estimated ancestral range probabilities under DEC versus DEC\* for node 8  
464 (C) and node 10 (D) are shown. Ancestral state estimates under the DEC model are more  
465 widespread than under DEC\*, therefore providing a different biogeographic history (C  
466 and D). Nodes closer to the root provide more variance in the probable ranges estimated  
467 (D).

## a) Fixed Cladogenesis

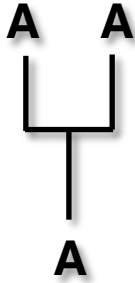

Single Area

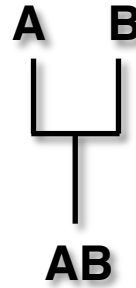

Between area  
widespread

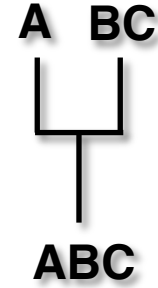

Within area  
widespread

## b) DEC Anagenesis

|             | $\emptyset$ | A     | B     | C     | AB       | AC       | BC       | ABC               |
|-------------|-------------|-------|-------|-------|----------|----------|----------|-------------------|
| $\emptyset$ | -           | 0     | 0     | 0     | 0        | 0        | 0        | 0                 |
| A           | $E_A$       | -     | 0     | 0     | $D_{AB}$ | $D_{AC}$ | 0        | 0                 |
| B           | $E_B$       | 0     | -     | 0     | $D_{BA}$ | 0        | $D_{BC}$ | 0                 |
| C           | $E_C$       | 0     | 0     | -     | 0        | $D_{CA}$ | $D_{CB}$ | 0                 |
| AB          | 0           | $E_B$ | $E_A$ | 0     | -        | 0        | 0        | $D_{AC} + D_{BC}$ |
| AC          | 0           | $E_C$ | 0     | $E_A$ | 0        | -        | 0        | $D_{AB} + D_{CB}$ |
| BC          | 0           | 0     | $E_C$ | $E_B$ | 0        | 0        | -        | $D_{BA} + D_{CA}$ |
| ABC         | 0           | 0     | 0     | 0     | $E_C$    | $E_B$    | $E_A$    | -                 |

## c) DEC\* Anagenesis

|             | $\emptyset$ | A     | B     | C     | AB       | AC       | BC       | ABC               |
|-------------|-------------|-------|-------|-------|----------|----------|----------|-------------------|
| $\emptyset$ | -           | 0     | 0     | 0     | 0        | 0        | 0        | 0                 |
| A           | 0           | -     | 0     | 0     | $D_{AB}$ | $D_{AC}$ | 0        | 0                 |
| B           | 0           | 0     | -     | 0     | $D_{BA}$ | 0        | $D_{BC}$ | 0                 |
| C           | 0           | 0     | 0     | -     | 0        | $D_{CA}$ | $D_{CB}$ | 0                 |
| AB          | 0           | $E_B$ | $E_A$ | 0     | -        | 0        | 0        | $D_{AC} + D_{BC}$ |
| AC          | 0           | $E_C$ | 0     | $E_A$ | 0        | -        | 0        | $D_{AB} + D_{CB}$ |
| BC          | 0           | 0     | $E_C$ | $E_B$ | 0        | 0        | -        | $D_{BA} + D_{CA}$ |
| ABC         | 0           | 0     | 0     | 0     | $E_C$    | $E_B$    | $E_A$    | -                 |

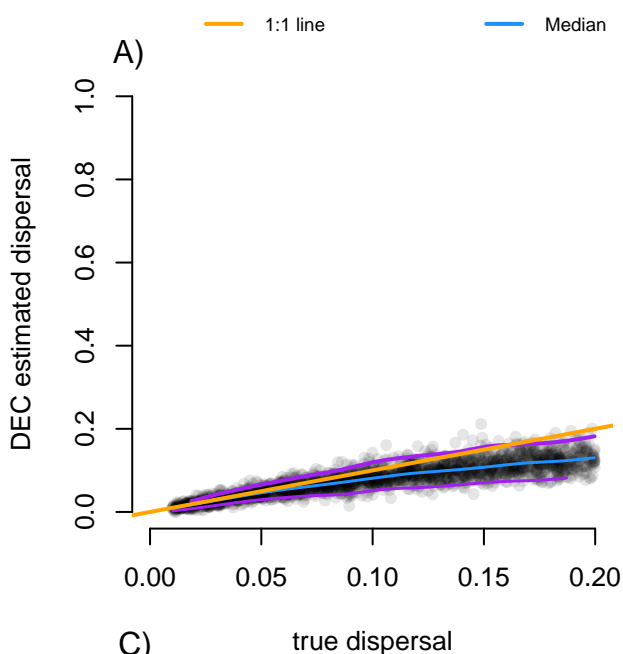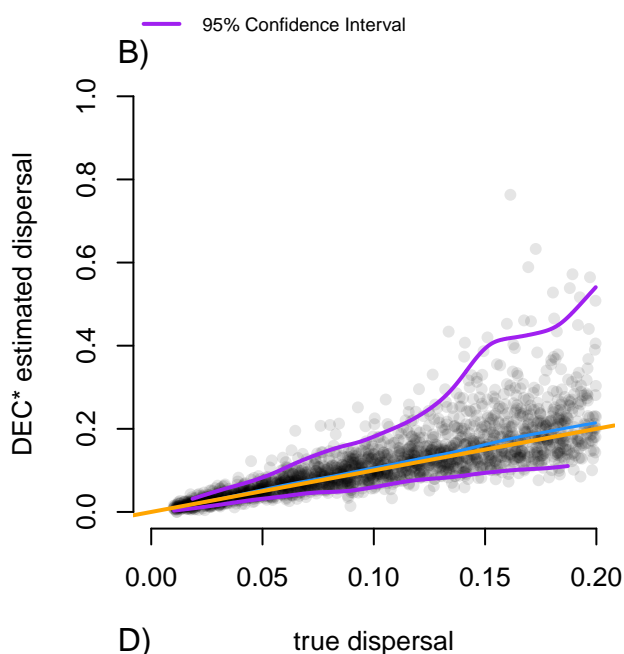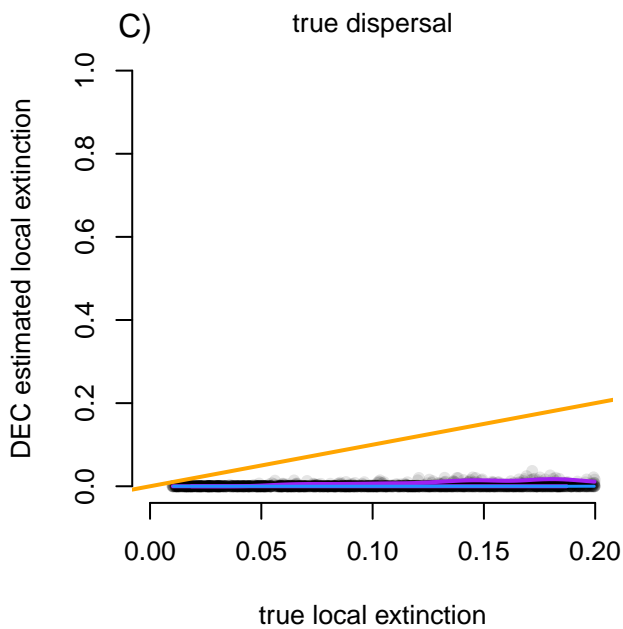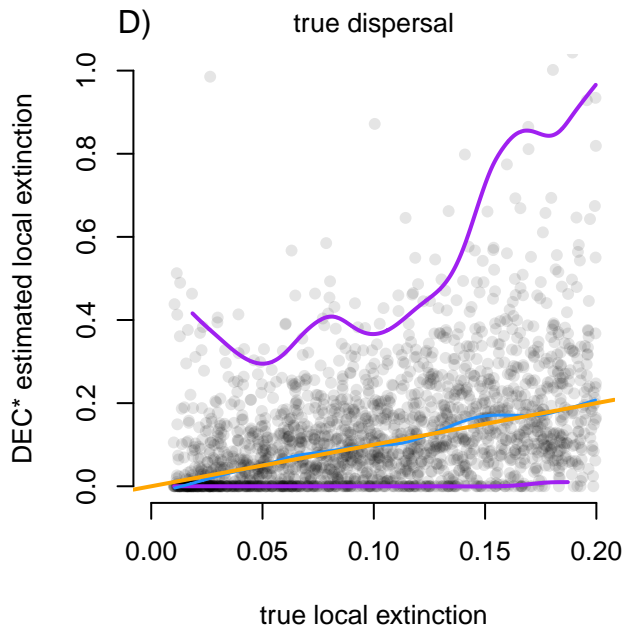

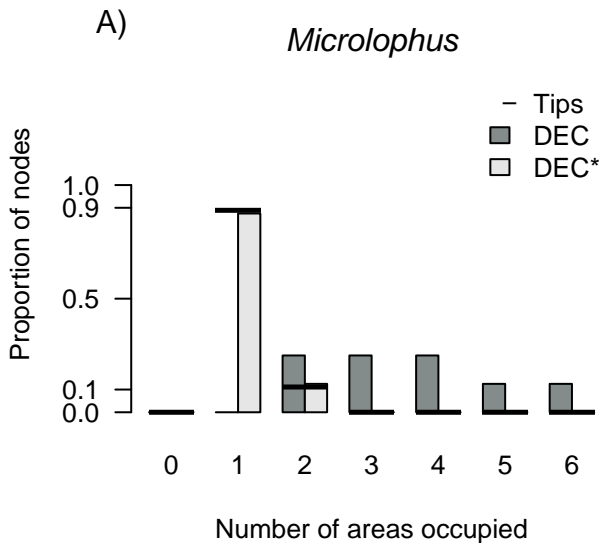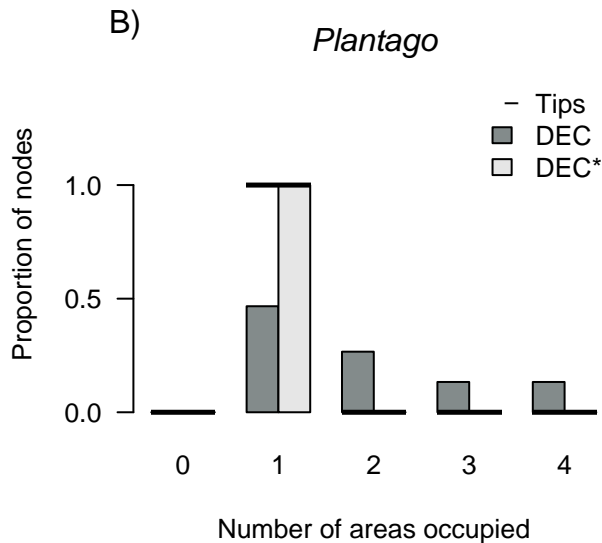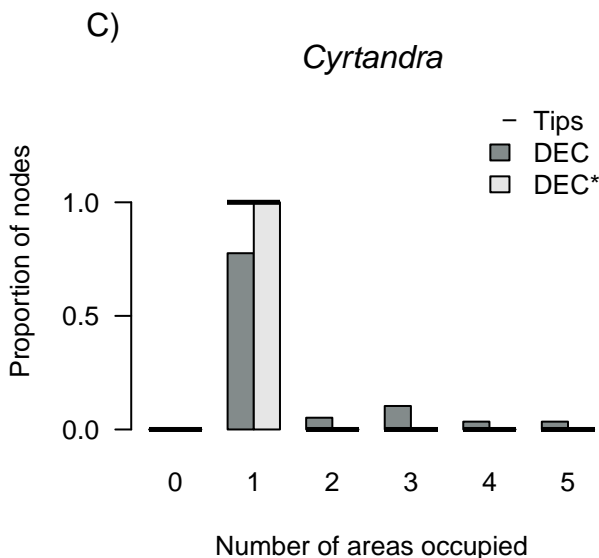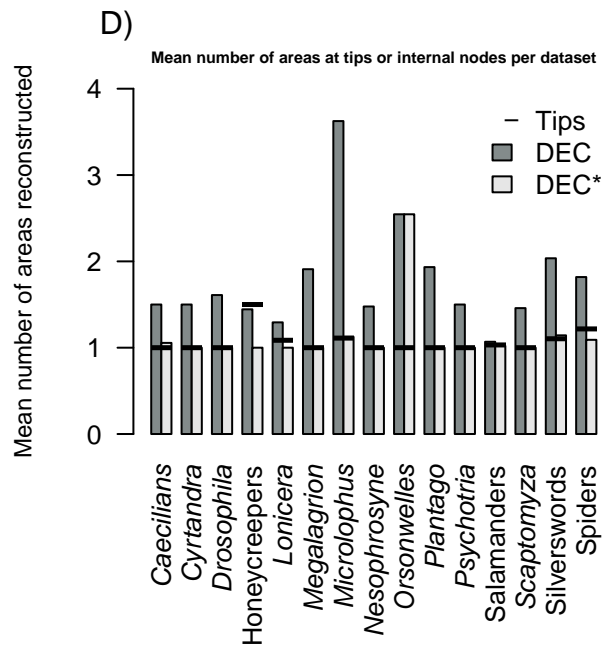



A)

## DEC most probable number of areas reconstructed

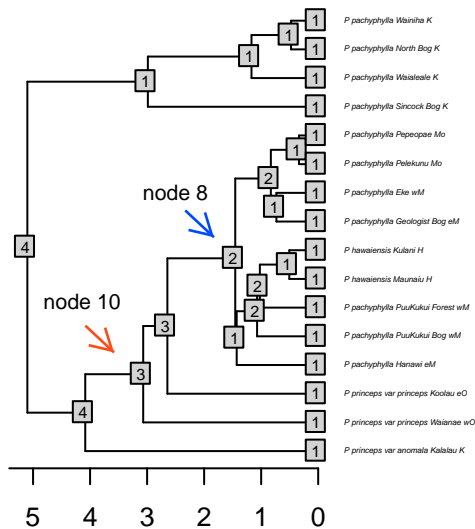

B)

## DEC\* most probable number of areas reconstructed

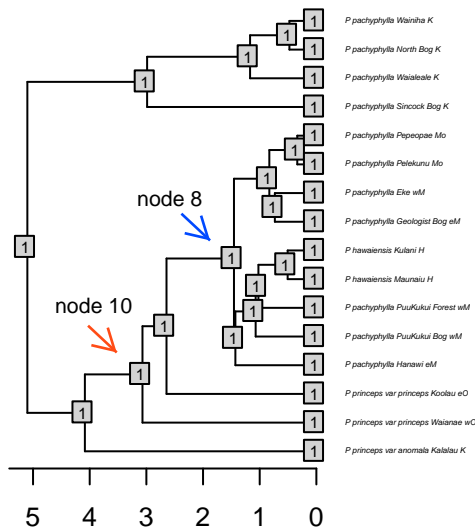

C)

## Ancestral area reconstructions for node 8

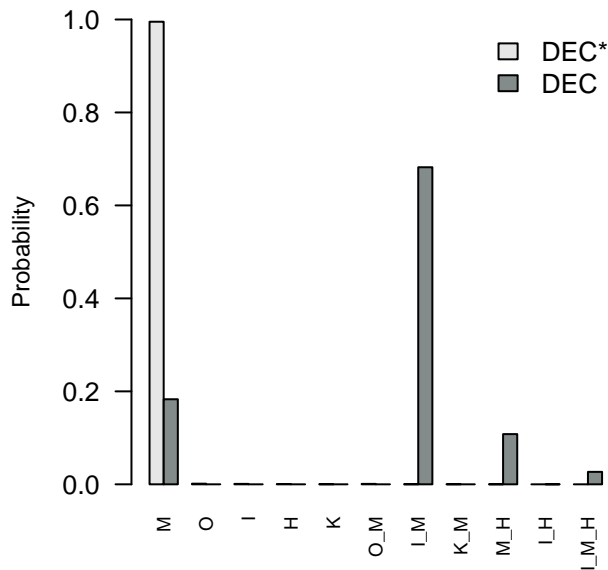

D)

## Ancestral area reconstructions for node 10

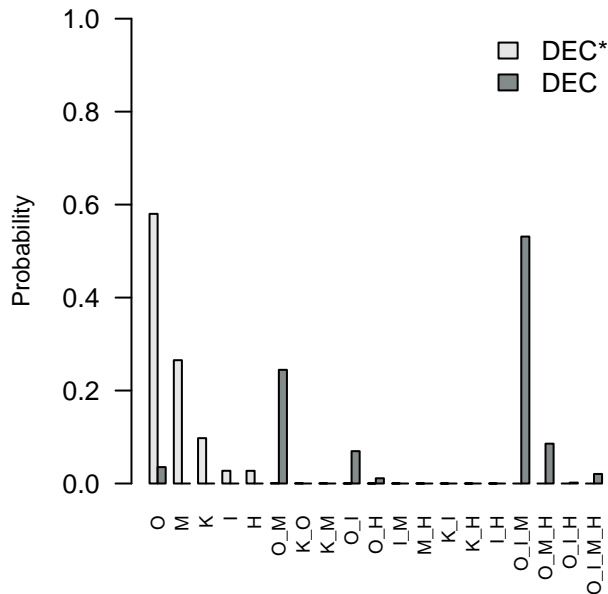

Source: https://www.biorxiv.org/content/biorxiv/early/2015/09/16/026914.full.pdf
